# Supplementary material for: Novel dual acceptor (D–D′–A′–π–A) dye-sensitized solar cells based on the triarylamine structure and benzothiadiazole double electron withdrawing unit
Source: Royal Society of Chemistry journal article supplement (doi:10.1039/d0nj05319h), 2021-01-01
Supplement: d0nj05319h1.pdf [file d0nj05319h1.pdf]

## Supporting information

### **Novel dual acceptor (D-D'-A'- $\pi$ -A) dye-sensitized solar cells based on triarylamine structure and benzothiadiazole double electron withdrawing unit**

Peijin Zheng,<sup>1,2,#</sup> Jian Xu,<sup>1,2,#</sup> Fei Peng,<sup>1</sup> Shengming Peng,<sup>1,\*</sup> Junxu Liao,<sup>2,\*\*</sup> Hongbin Zhao,<sup>2,\*\*\*</sup> Ledong Li,<sup>2</sup> Xiangyan Zeng,<sup>2</sup> and Heyu Yu<sup>2</sup>

*1 College of Chemistry, Xiangtan University, Xiangtan 411105, People's Republic of China.*

*2. College of Chemical Engineering and Energy Technology, Dongguan University of Technology, Dongguan 523808, People's Republic of China.*

<sup>1</sup>H NMR, <sup>13</sup>C NMR spectra and mass spectra of all unknown compounds are shown in the Supporting Information. (Fig. S1– Fig. S27)

---

# These authors contributed equally to this work.

\* Corresponding author. Prof. S. Peng. Tel.: +86-158-9855-8266; e-mail: pengshengming@21cn.com

\*\* Corresponding author. Prof. J. Liao. Tel.: +86-158-1831-8389; e-mail: liaojx83@126.com.

\*\*\* Corresponding author. Prof. H. Zhao. Tel.: +86-138-2722-3583; e-mail: zhaohbhanlf@163.com.

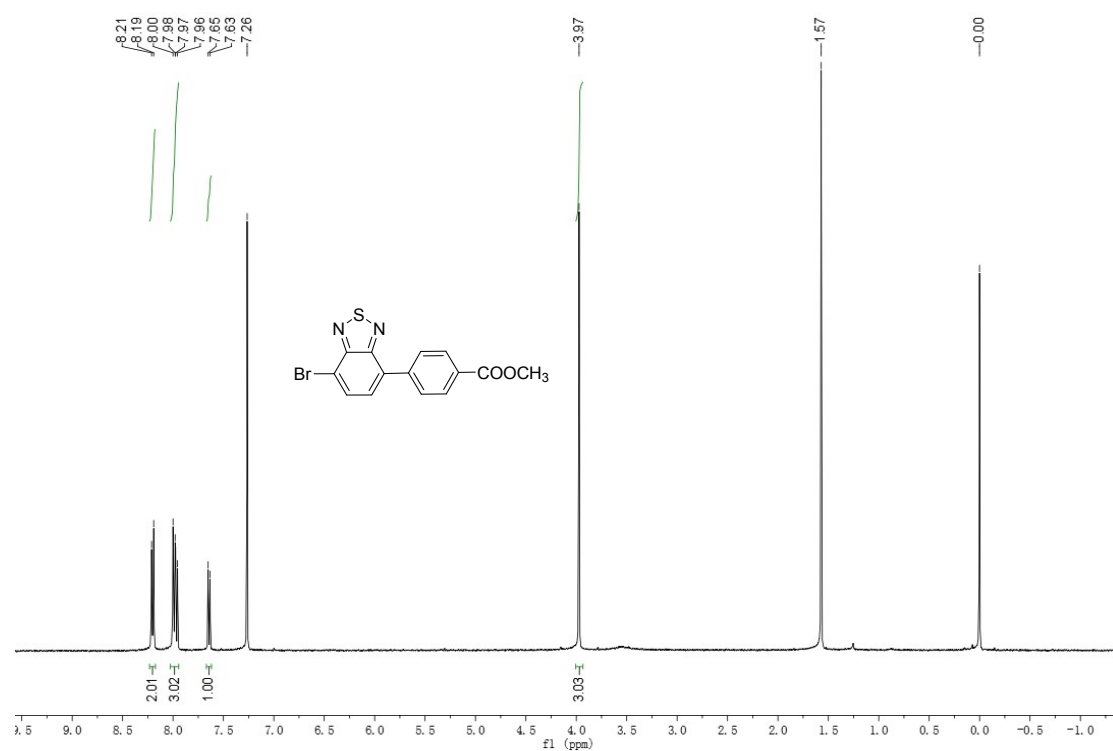

**Fig. S1.** <sup>1</sup>H NMR of Methyl-4-(7-bromobenzo[c][1,2,5]thiadiazol-4-yl)benzoate (**1**)

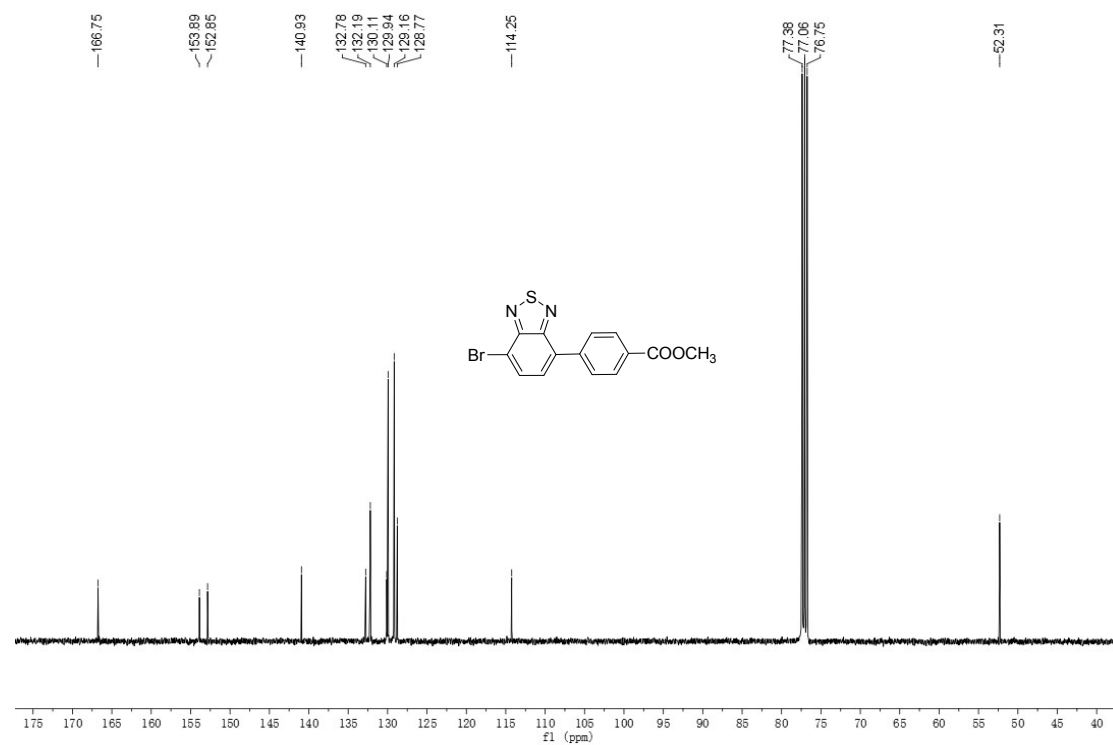

**Fig. S2.** <sup>13</sup>C NMR of Methyl-4-(7-bromobenzo[c][1,2,5]thiadiazol-4-yl)benzoate (**1**)

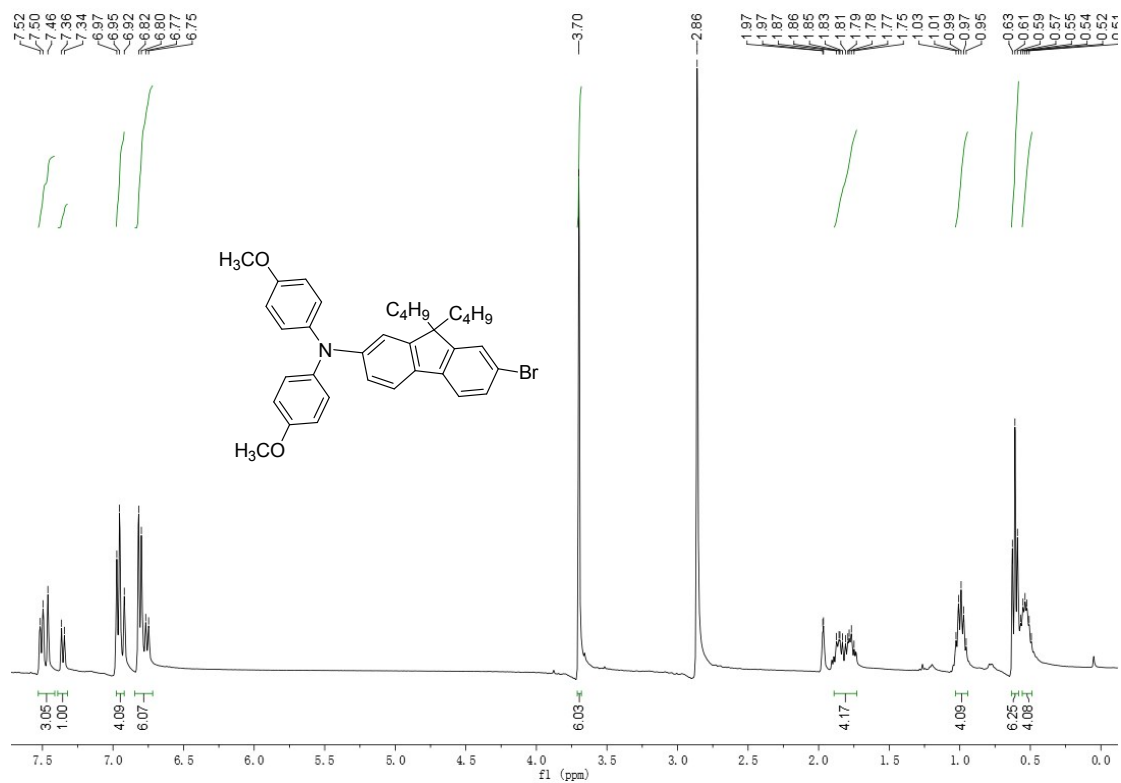

**Fig. S3.** <sup>1</sup>H NMR of 7-Bromo-9,9-dibutyl-N,N-bis(4-methoxyphenyl)-9H-fluoren-2-amine (**5**)

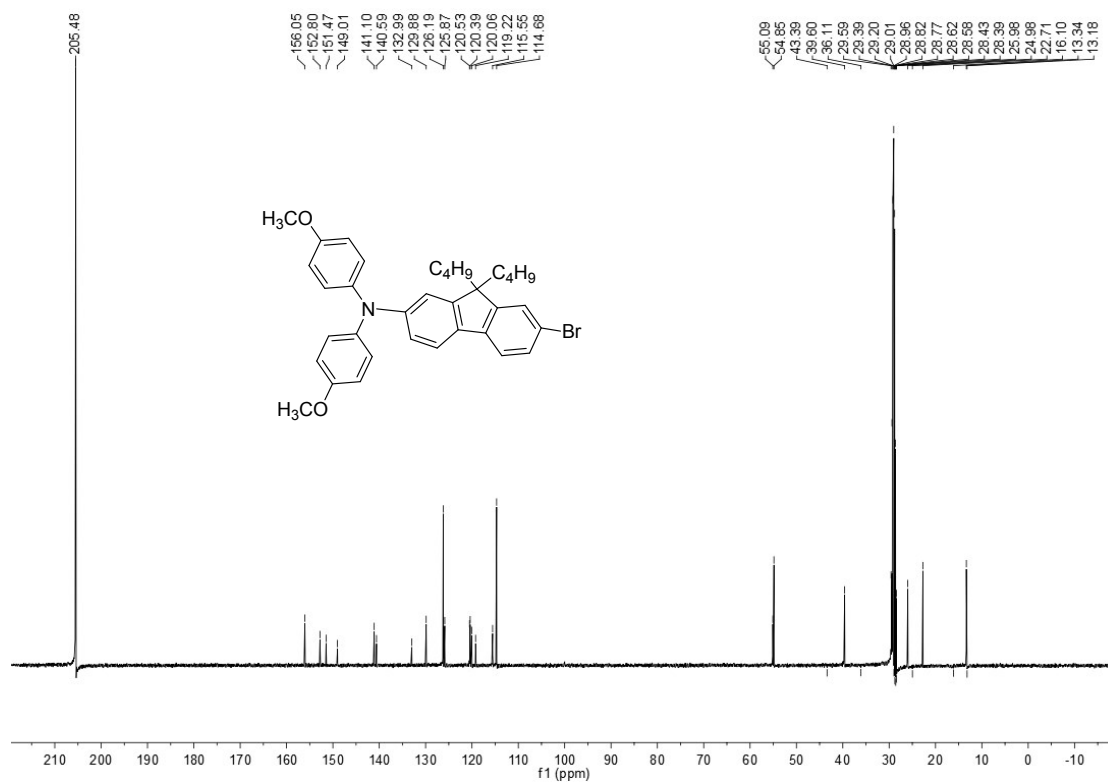

**Fig. S4.** <sup>13</sup>C NMR of 7-Bromo-9,9-dibutyl-N,N-bis(4-methoxyphenyl)-9H-fluoren-2-amine (**5**)

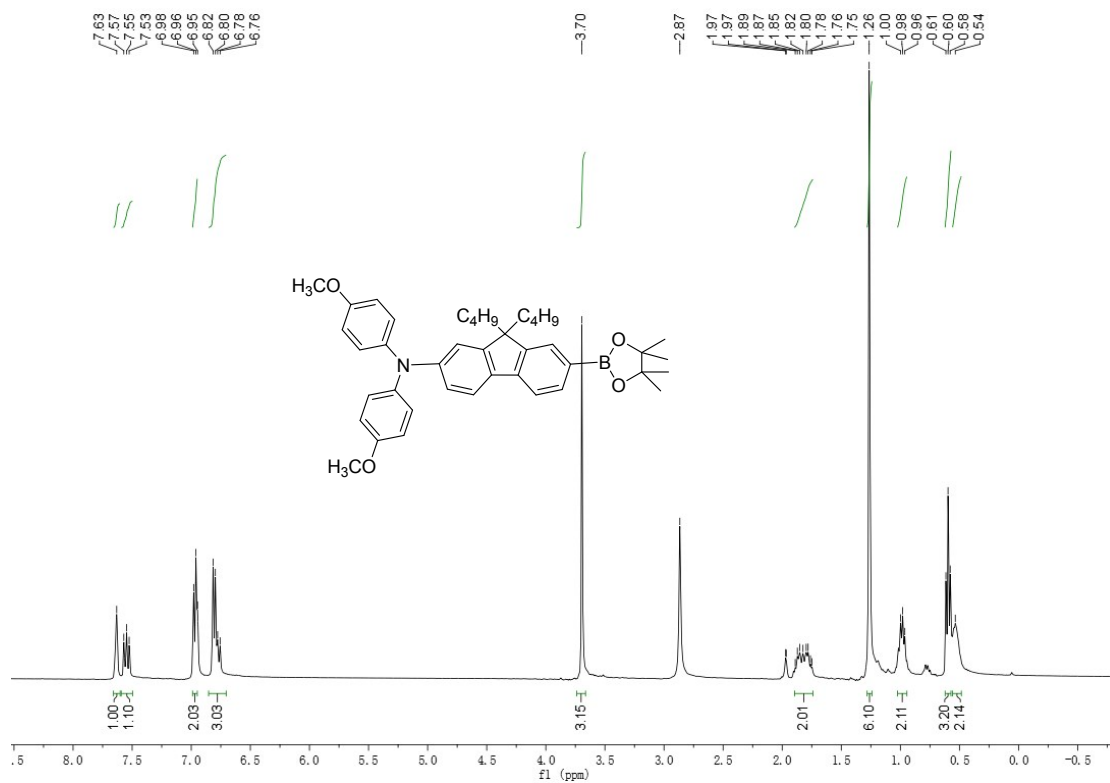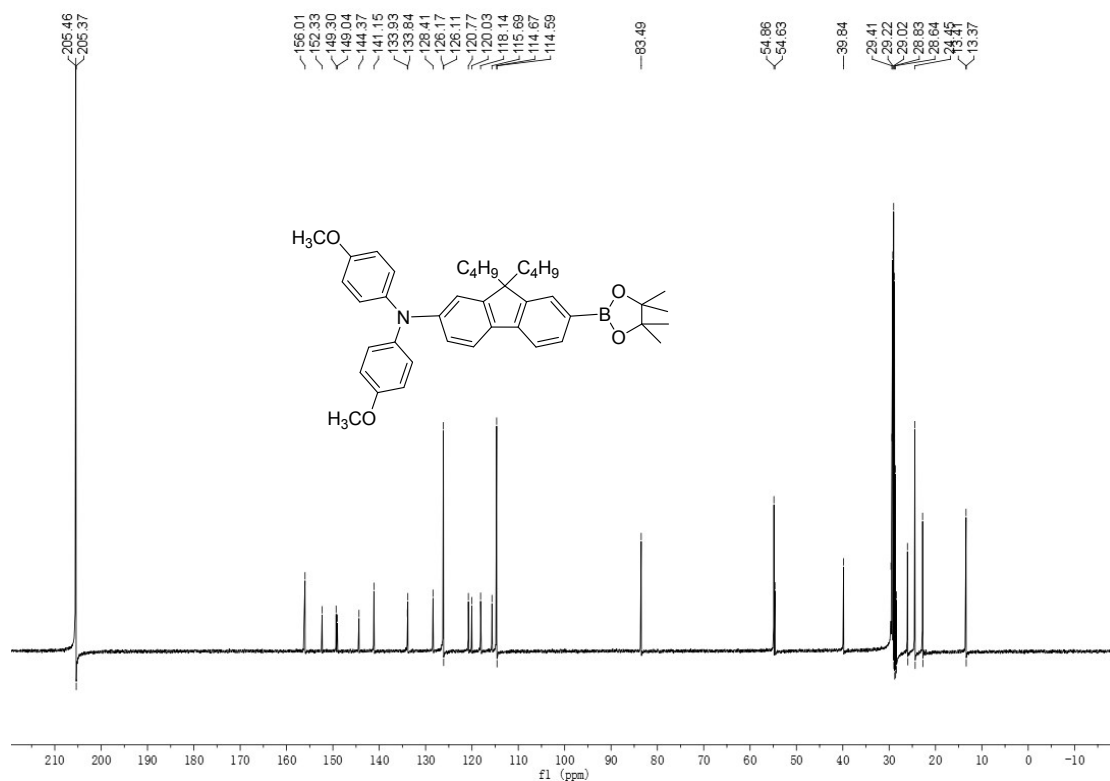

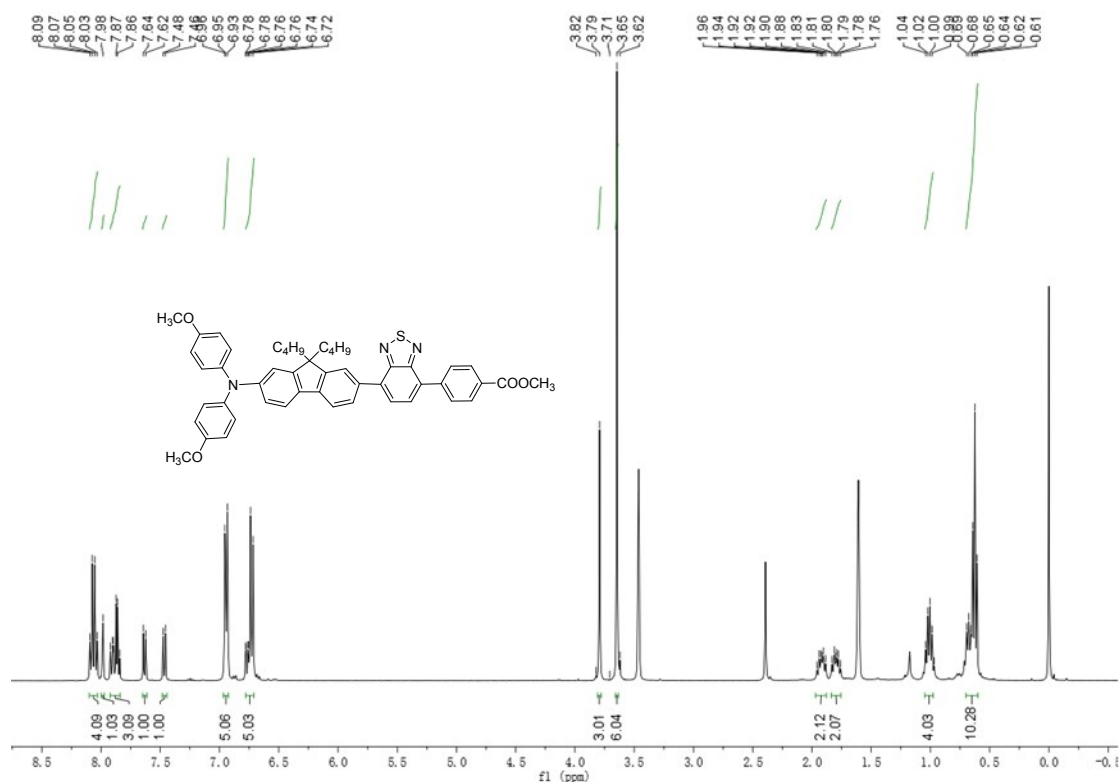

**Fig. S7.** <sup>1</sup>H NMR of Methyl-4-(7-(7-(bis(4-methoxyphenyl)amino)-9,9-dibutyl-9H-fluoren-2-yl)benzo[c][1,2,5]thiadiazol-4-yl)benzoate (**11**)

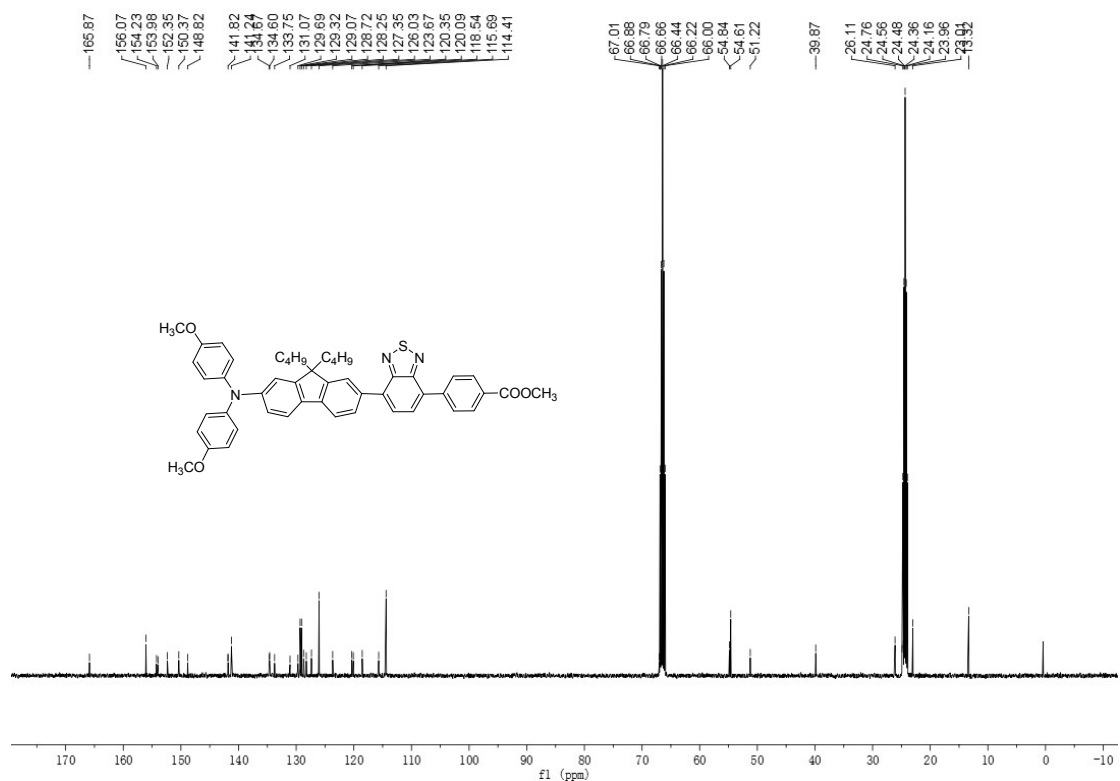

**Fig. S8.** <sup>13</sup>C NMR of Methyl-4-(7-(7-(bis(4-methoxyphenyl)amino)-9,9-dibutyl-9H-fluoren-2-yl)benzo[c][1,2,5]thiadiazol-4-yl)benzoate (**11**)

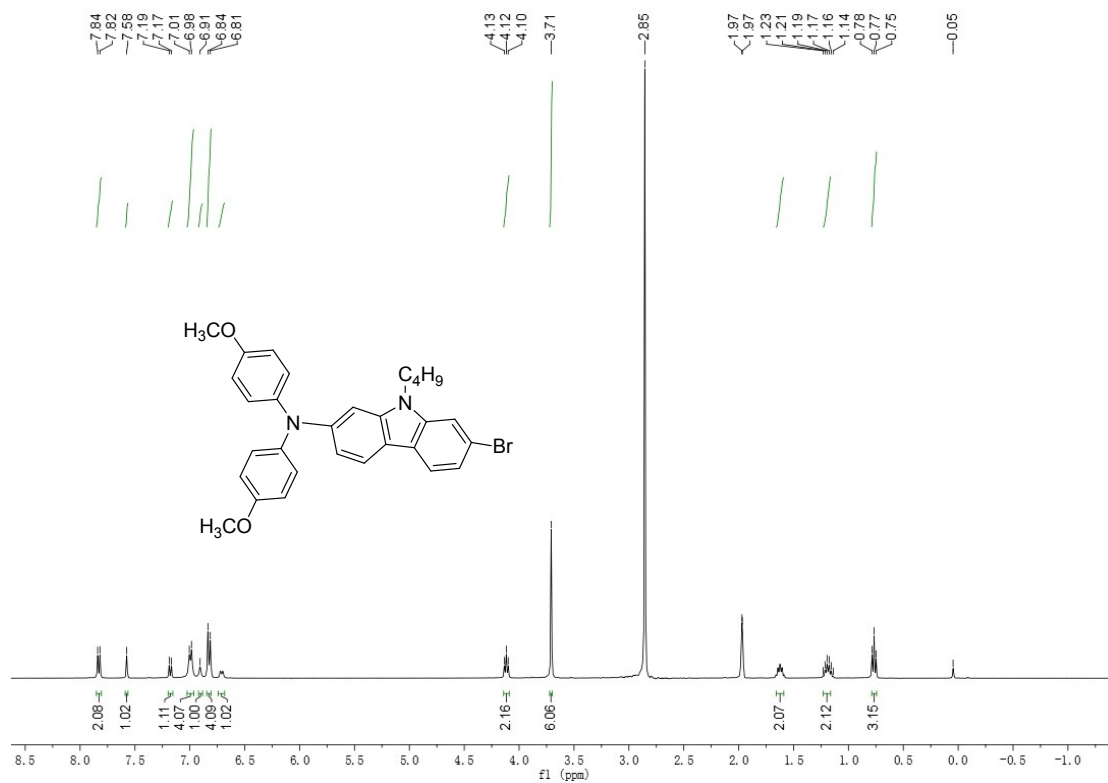

**Fig. S9.** <sup>1</sup>H NMR of 7-Bromo-9-butyl-N,N-bis(4-methoxyphenyl)-9H-carbazol-2-amine (6)

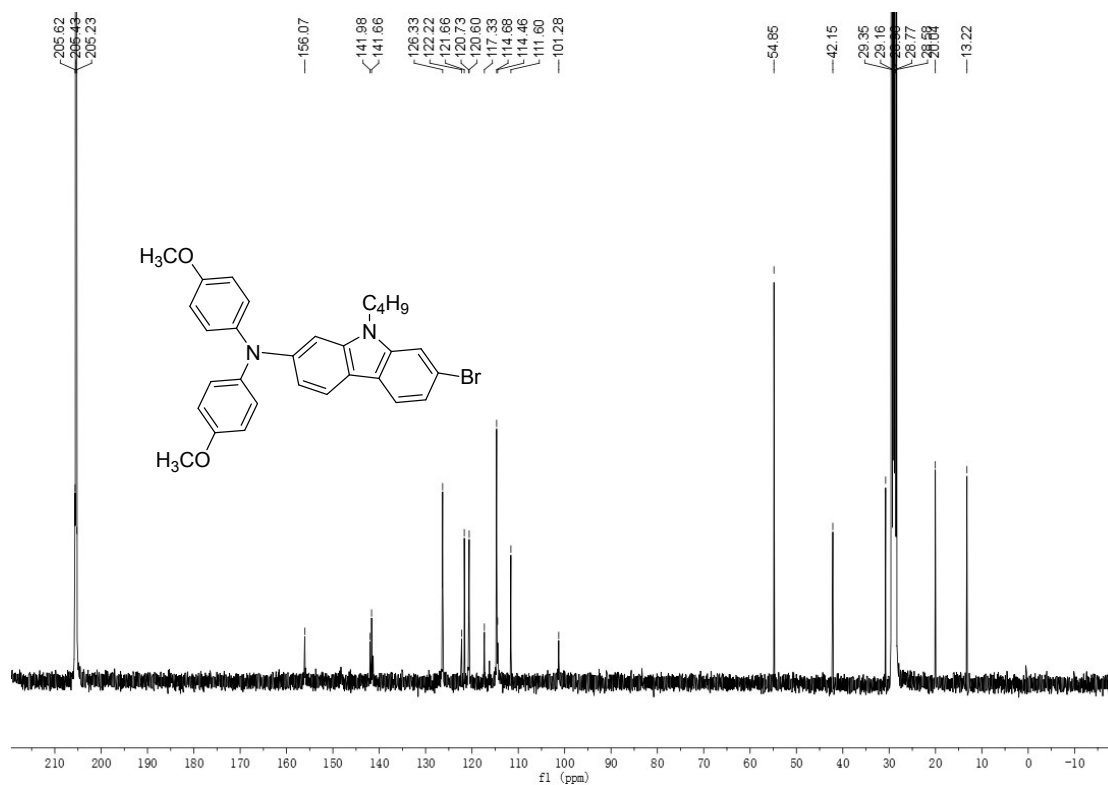

**Fig. S10.** <sup>13</sup>C NMR of 7-Bromo-9-butyl-N,N-bis(4-methoxyphenyl)-9H-carbazol-2-amine (6)

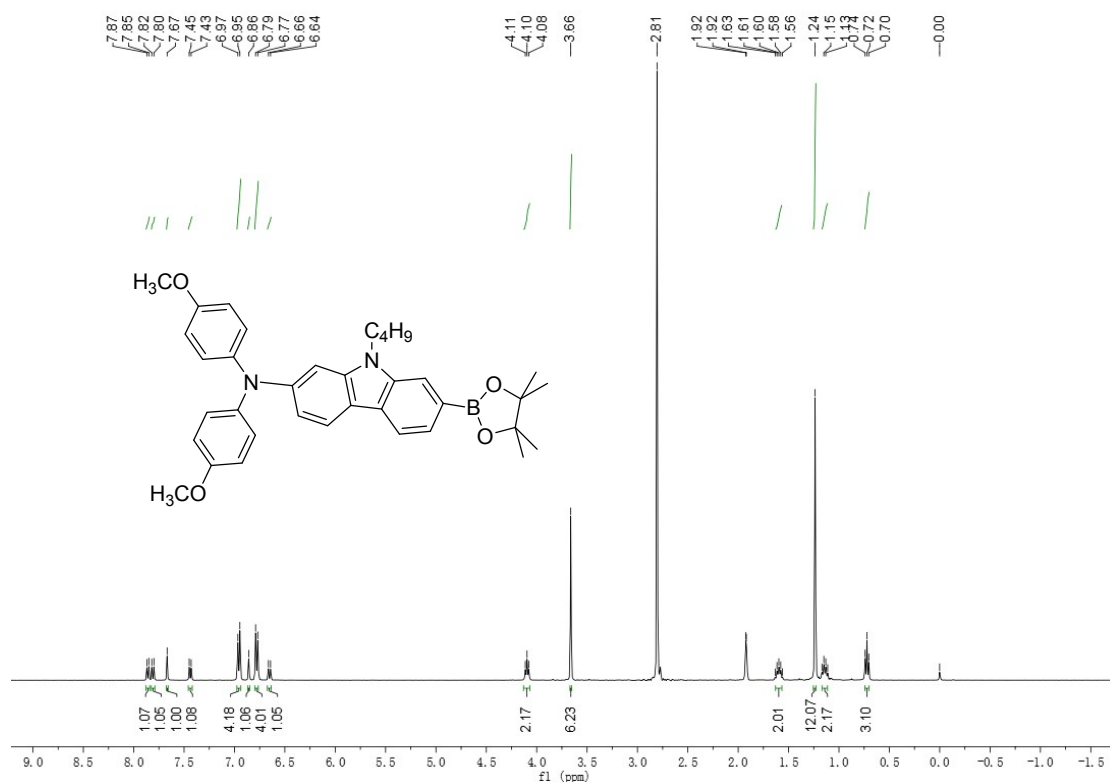

**Fig. S11.** <sup>1</sup>H NMR of 9-Butyl-N,N-bis(4-methoxyphenyl)-7-(4,4,5,5-tetramethyl-1,3,2-dioxaborolan-2-yl)-9H-carbazol-2-amine (**9**)

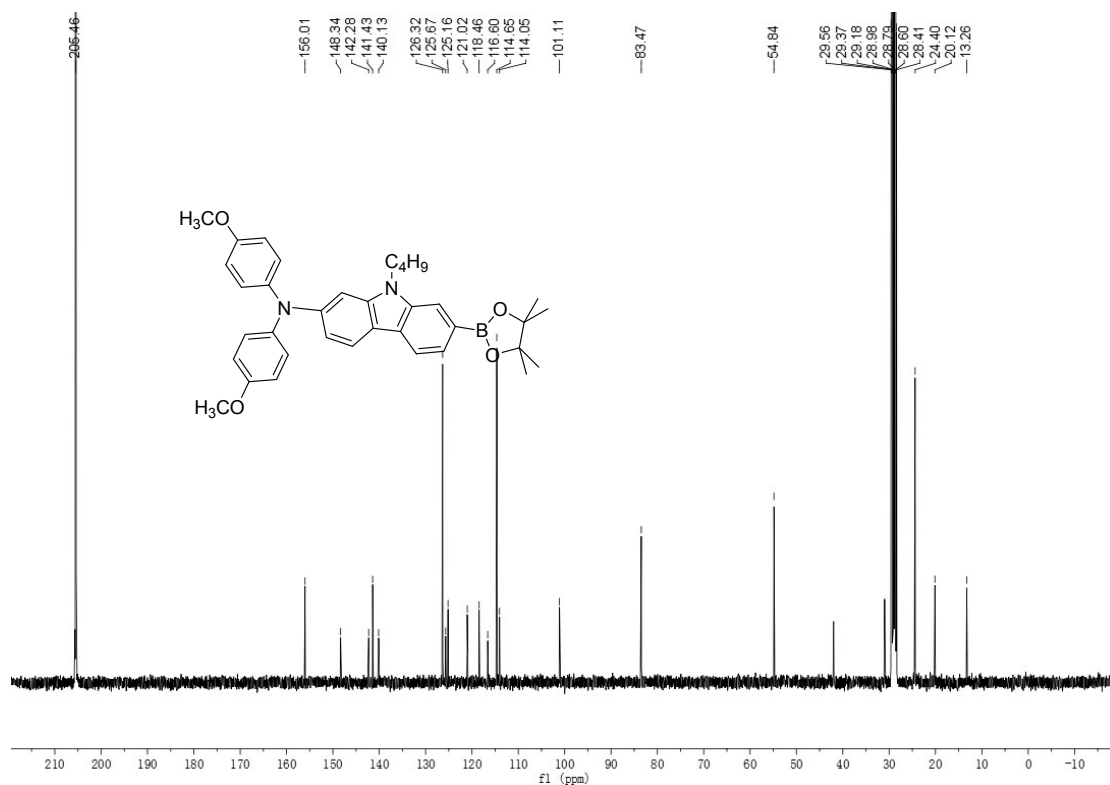

**Fig. S12.** <sup>13</sup>C NMR of 9-Butyl-N,N-bis(4-methoxyphenyl)-7-(4,4,5,5-tetramethyl-1,3,2-dioxaborolan-2-yl)-9H-carbazol-2-amine (**9**)

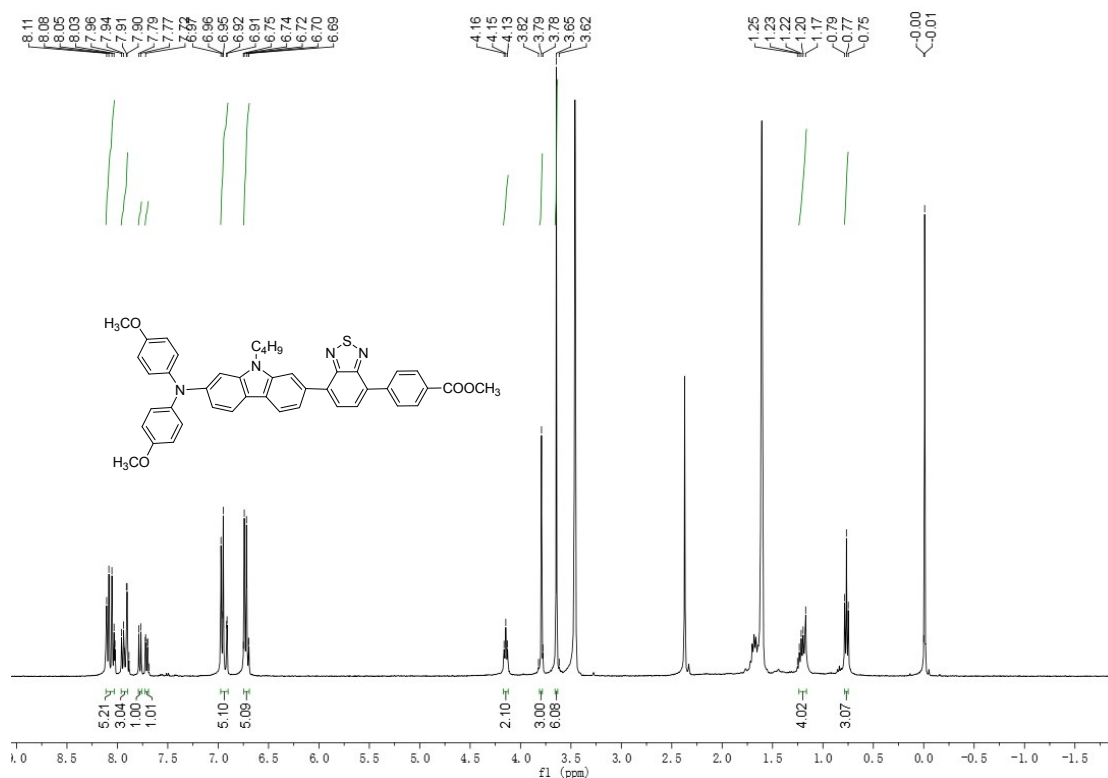

**Fig. S13.**  $^1\text{H}$  NMR of Methyl-4-(7-(7-(bis(4-methoxyphenyl)amino)-9-butyl-9H-carbazol-2-yl)benzo[c][1,2,5]thiadiazol-4-yl)benzoate (**12**)

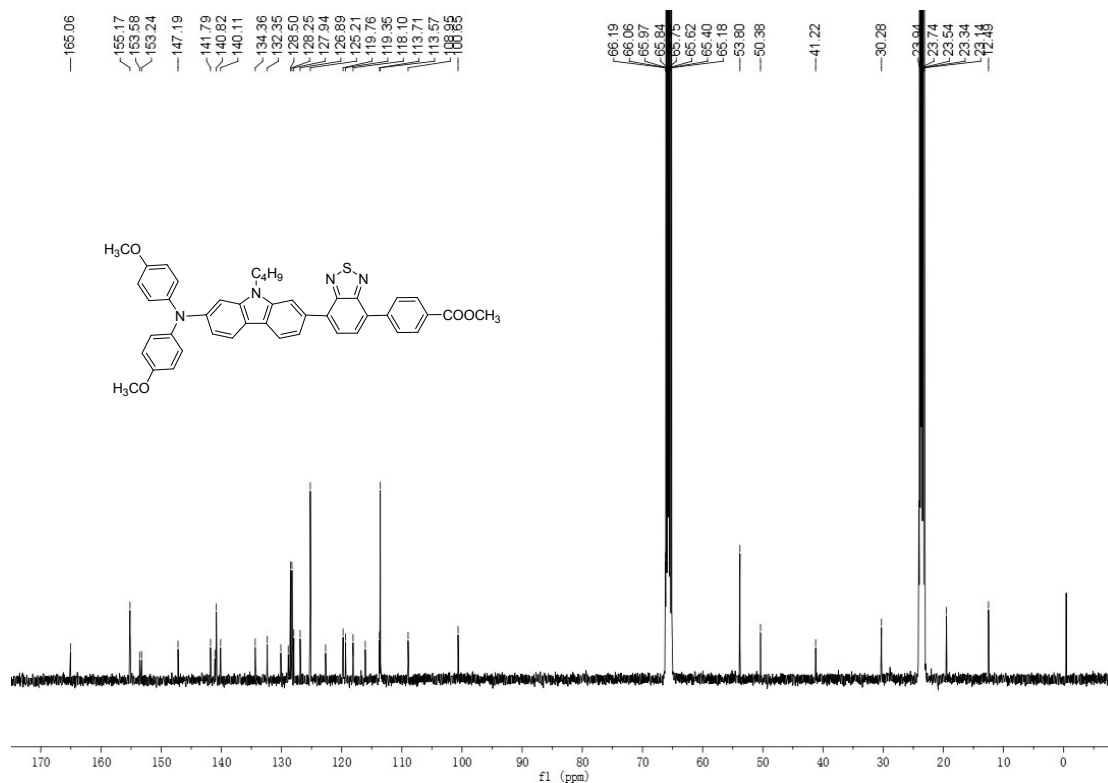

**Fig. S14.**  $^{13}\text{C}$  NMR of Methyl-4-(7-(7-(bis(4-methoxyphenyl)amino)-9-butyl-9H-carbazol-2-yl)benzo[c][1,2,5]thiadiazol-4-yl)benzoate (**12**)



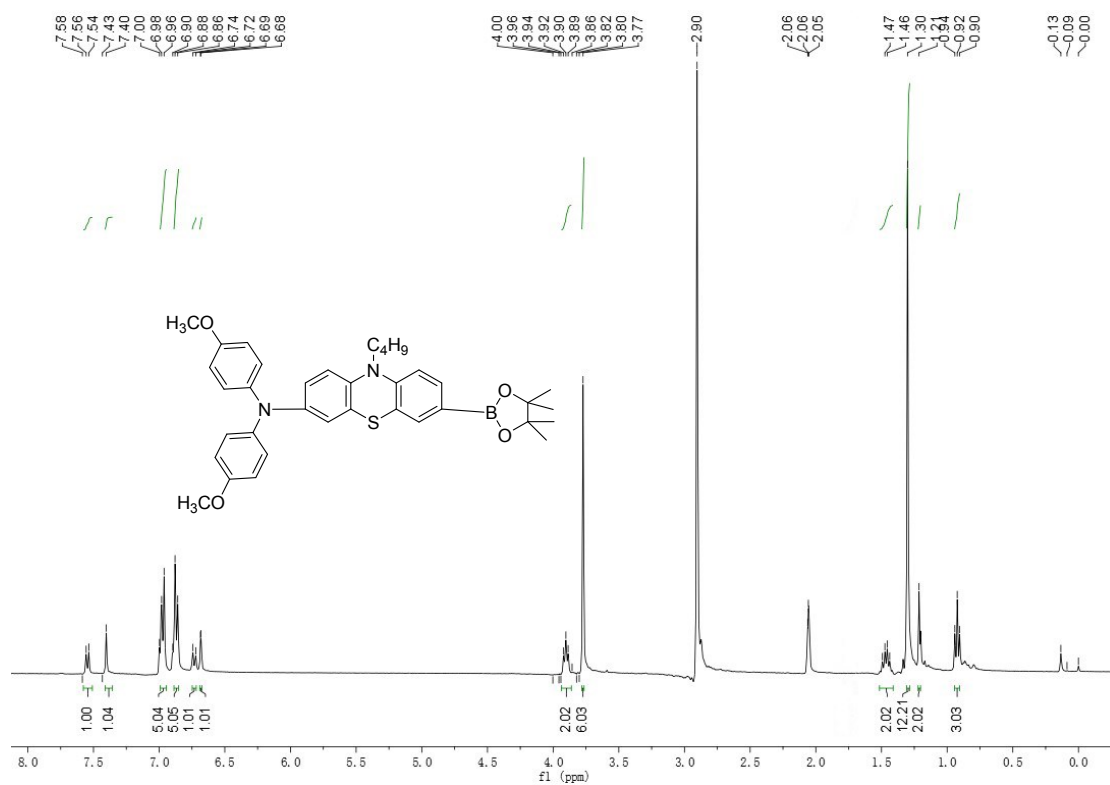

**Fig. S15.** <sup>1</sup>H NMR of 10-Butyl-N,N-bis(4-methoxyphenyl)-7-(4,4,5,5-tetramethyl-1,3,2-dioxaborolan-2-yl)-10H-phenothiazin-3-amine (**10**)

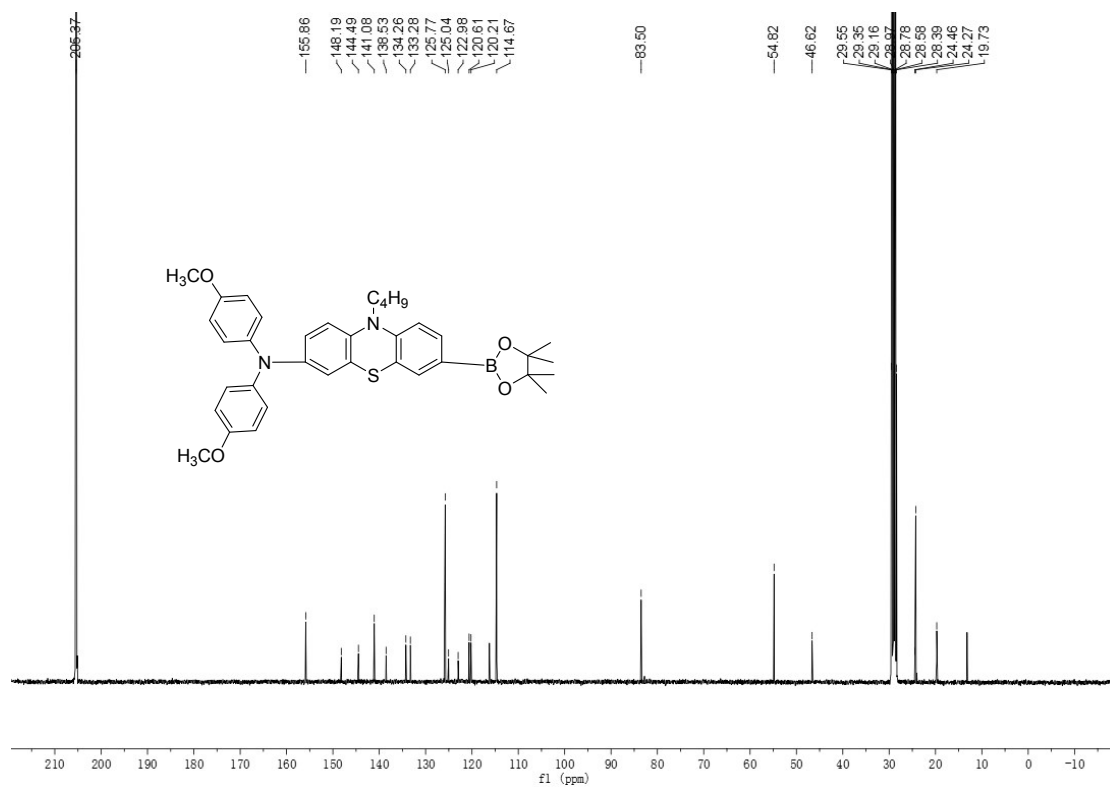

**Fig. S16.** <sup>13</sup>C NMR of 10-Butyl-N,N-bis(4-methoxyphenyl)-7-(4,4,5,5-tetramethyl-1,3,2-dioxaborolan-2-yl)-10H-phenothiazin-3-amine (**10**)

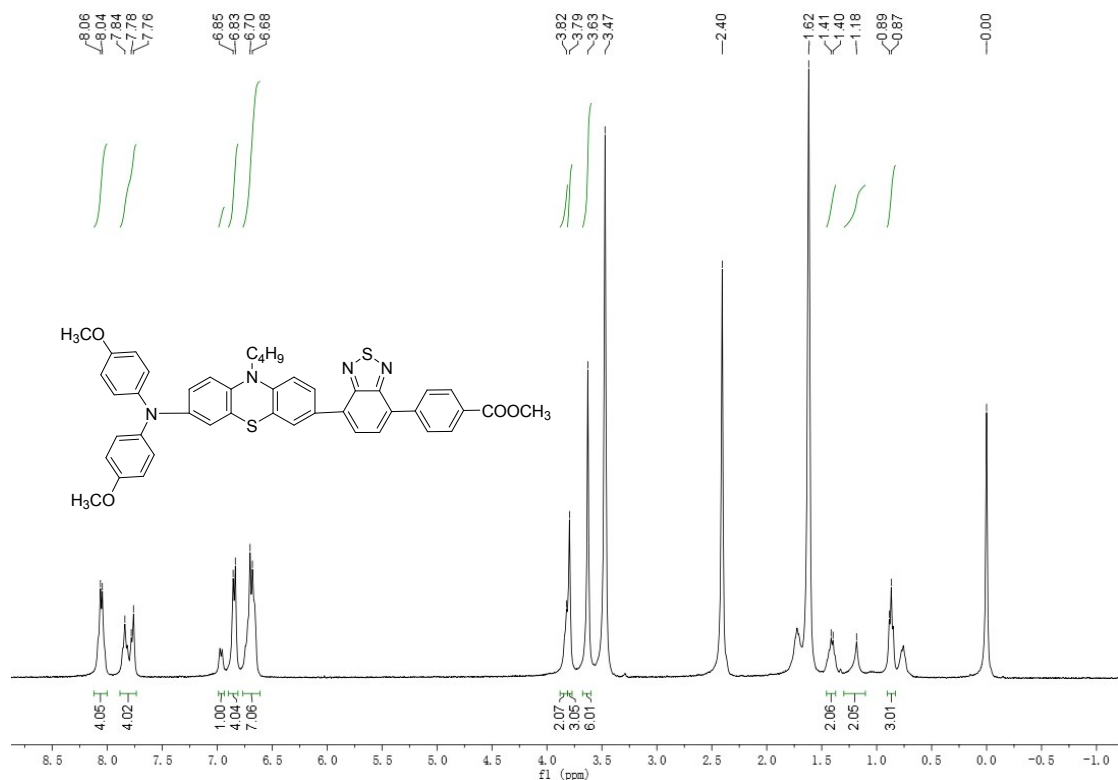

**Fig. S17.** <sup>1</sup>H NMR of Methyl-4-(7-(7-(bis(4-methoxyphenyl)amino)-10-butyl-10H-phenothiazin-3-yl)benzo[c][1,2,5]thiadiazol-4-yl)benzoate (**13**)

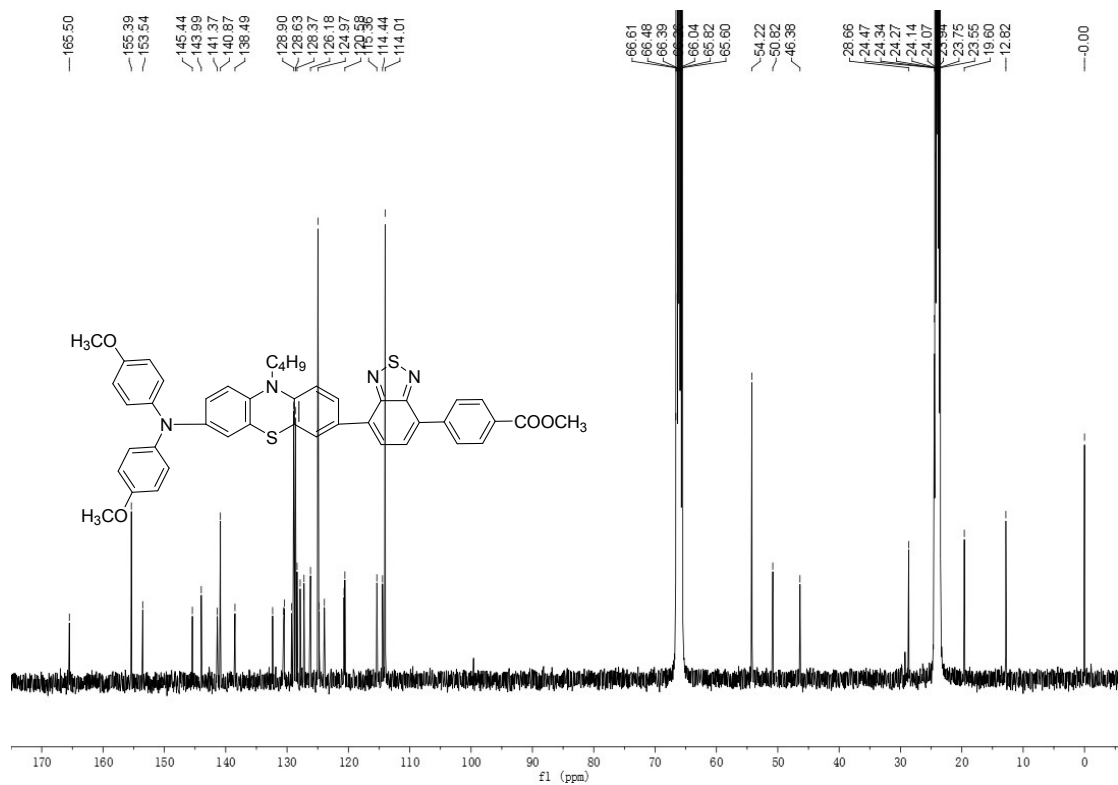

**Fig. S18.** <sup>13</sup>C NMR of Methyl-4-(7-(7-(bis(4-methoxyphenyl)amino)-10-butyl-10H-phenothiazin-3-yl)benzo[c][1,2,5]thiadiazol-4-yl)benzoate (**13**)

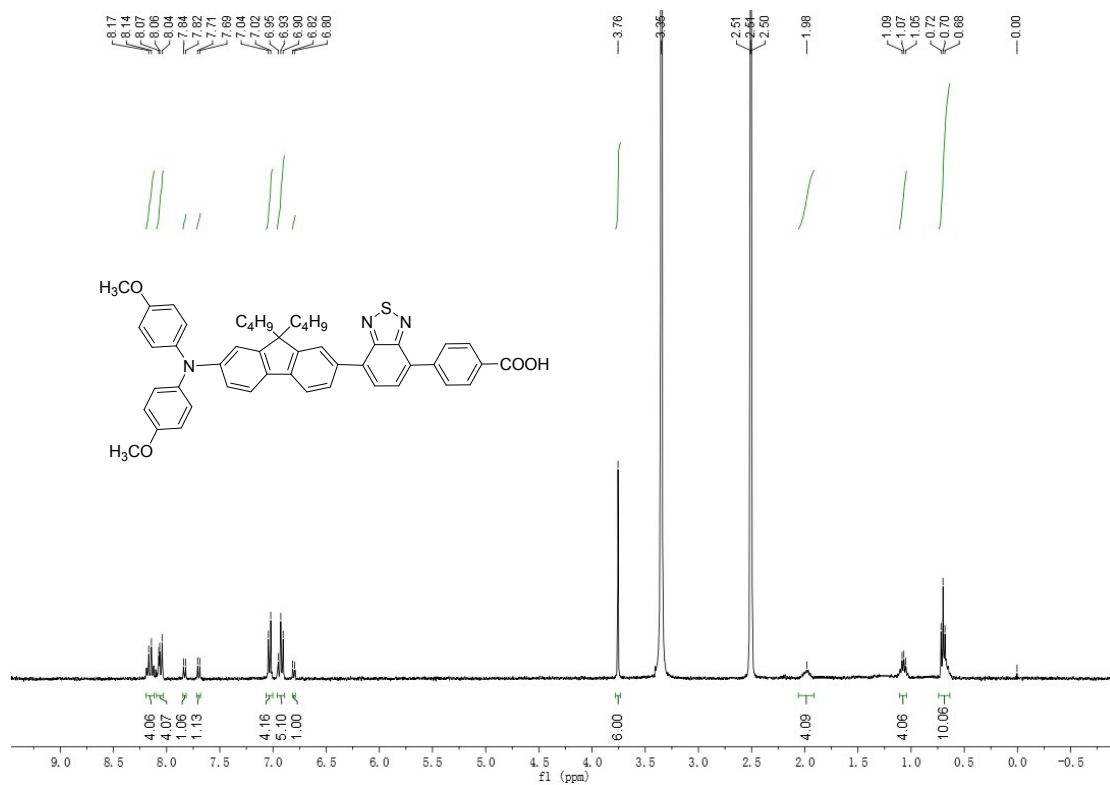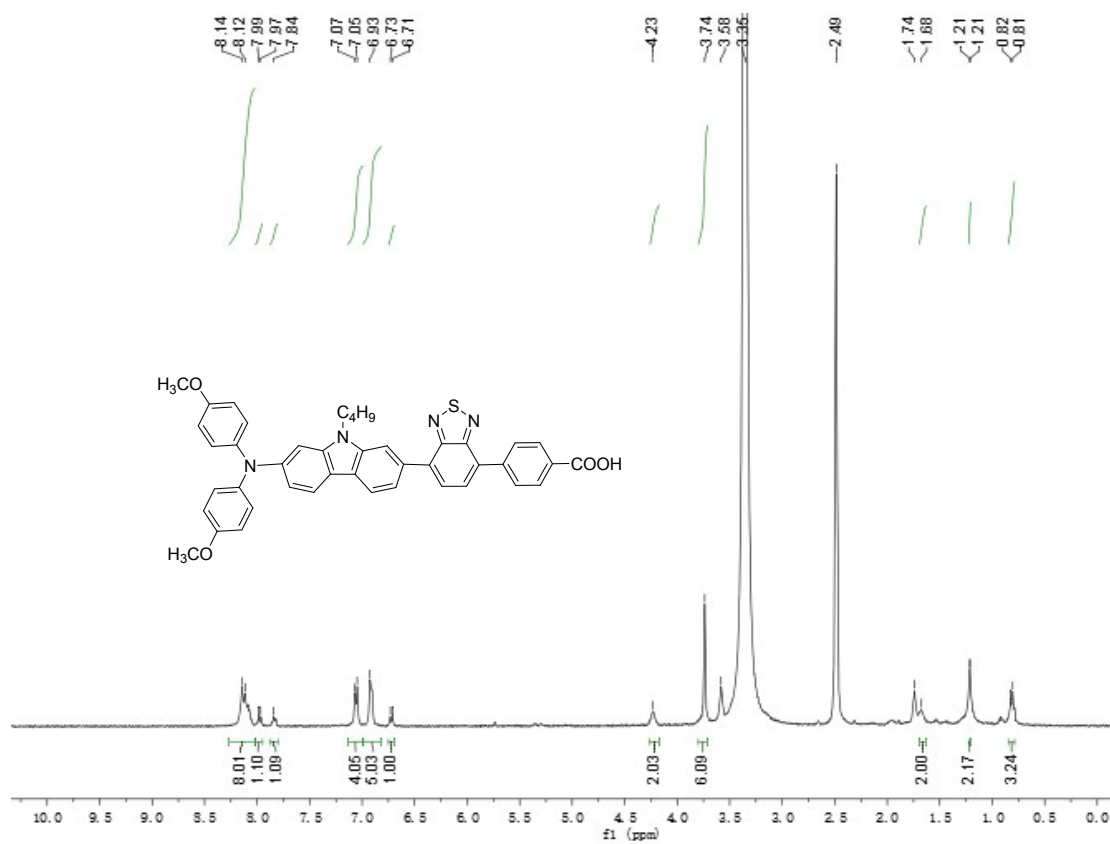

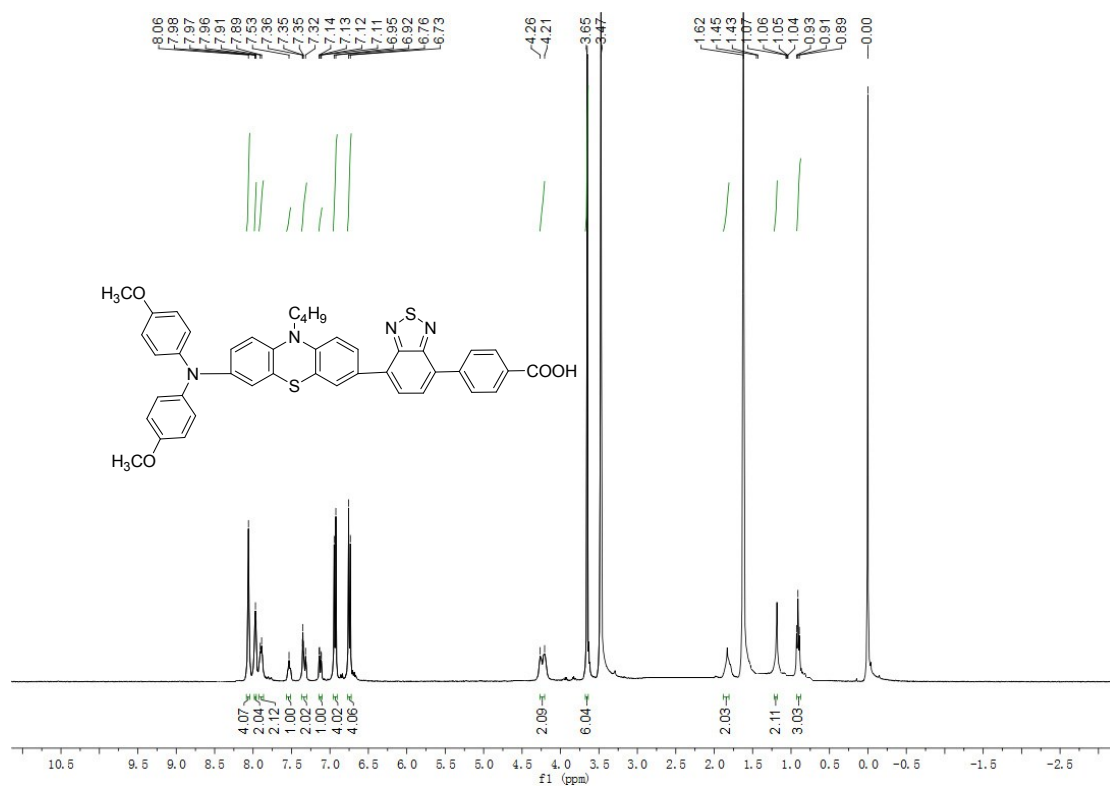

Fig. S21. <sup>1</sup>H NMR of BT6.

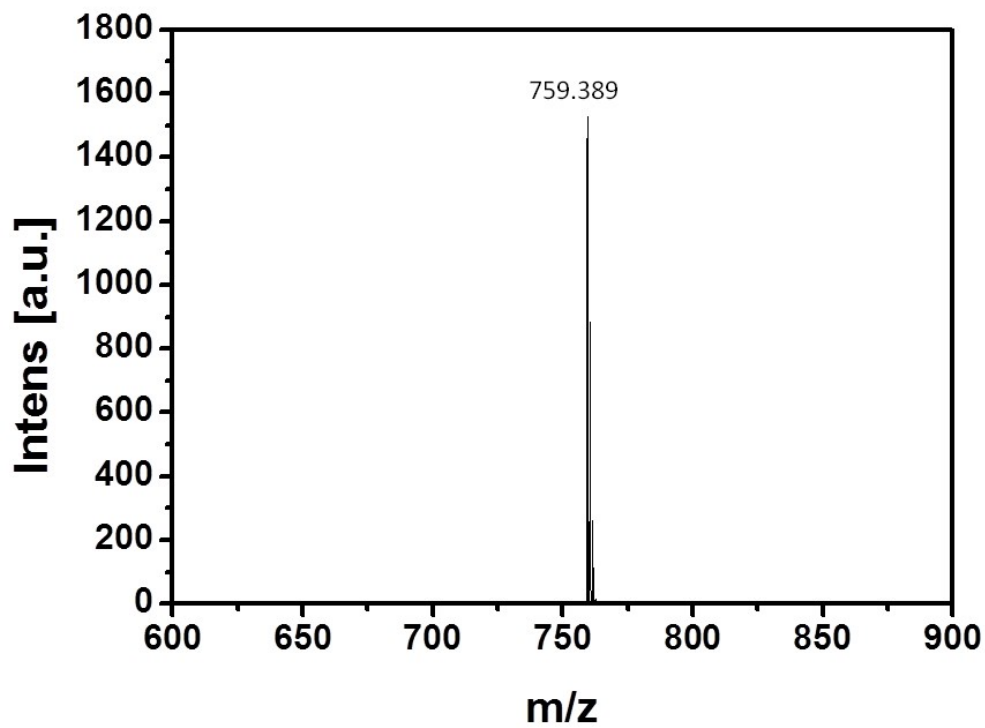

Fig. S22. MALDI-TOF-MS spectrum of compound BT4

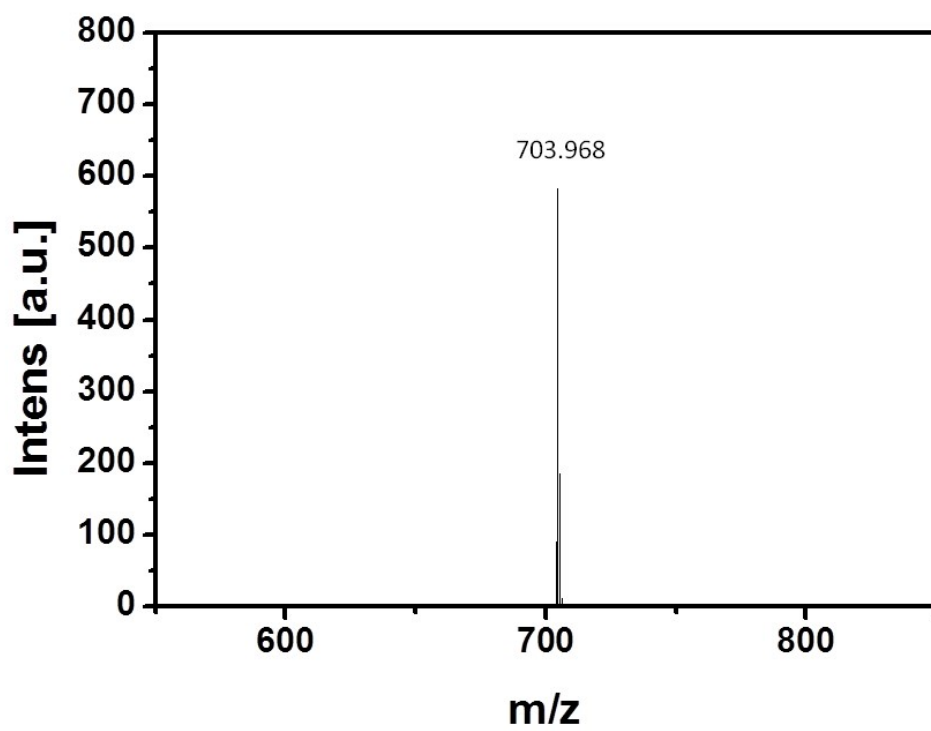

Fig. S23. MALDI-TOF-MS spectrum of compound **BT5**

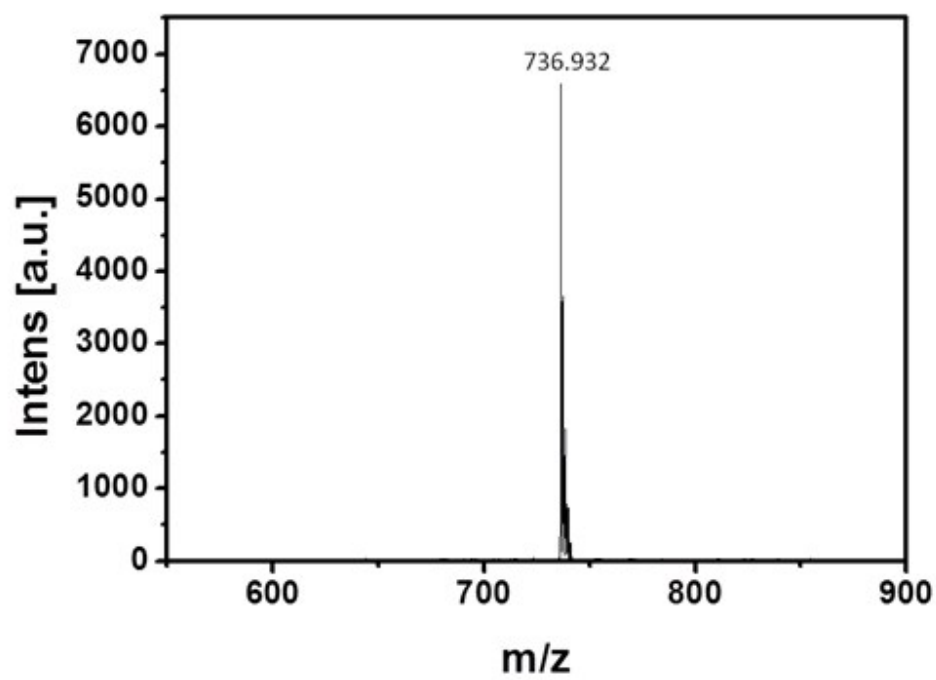

Fig. S24. MALDI-TOF-MS spectrum of compound **BT6**

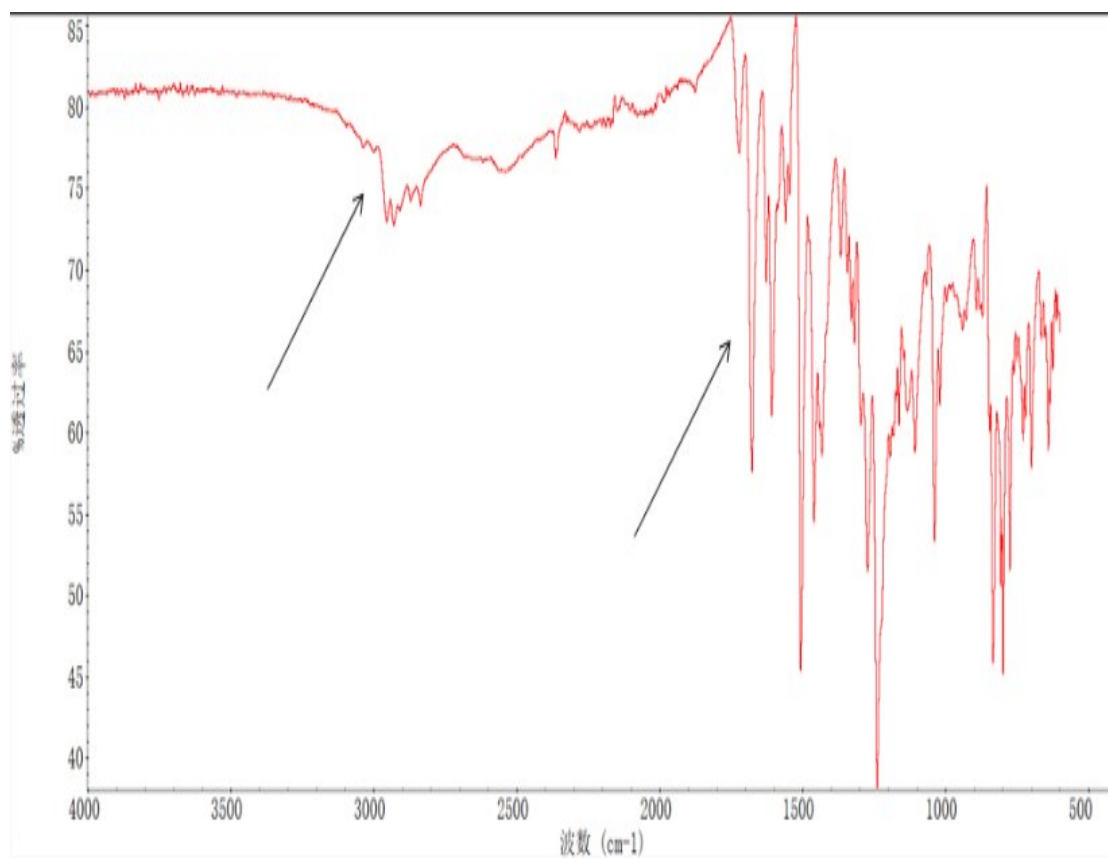

**Fig. S25.** Infrared spectrum of compound **BT4**

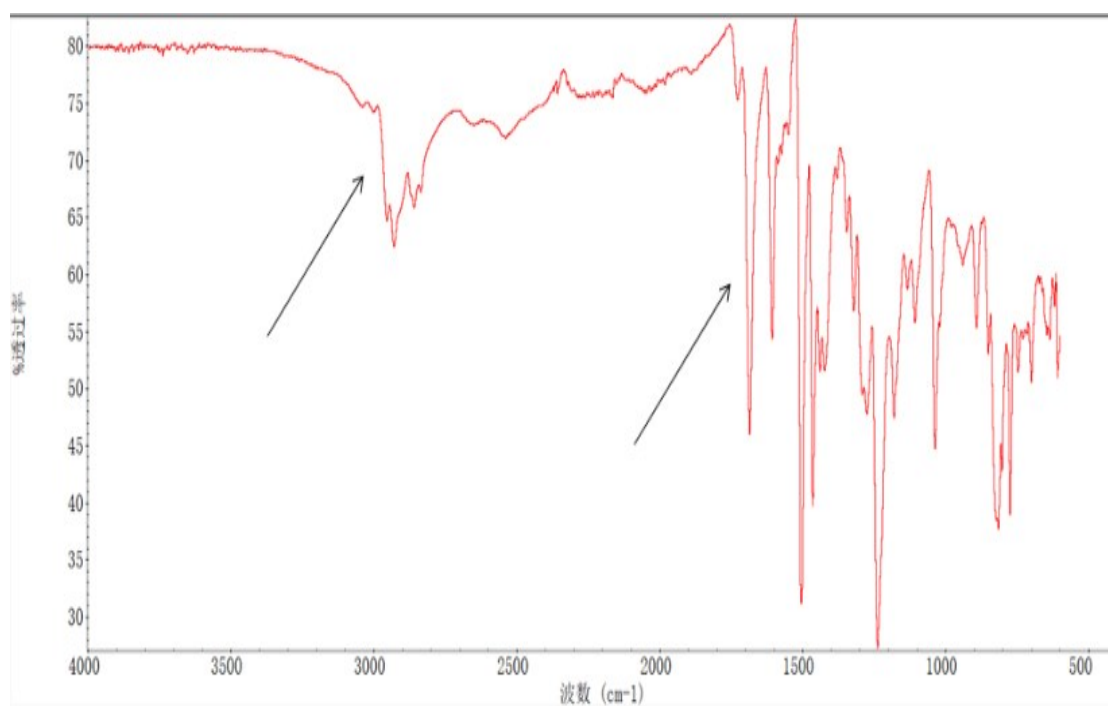

**Fig. S26.** Infrared spectrum of compound **BT5**

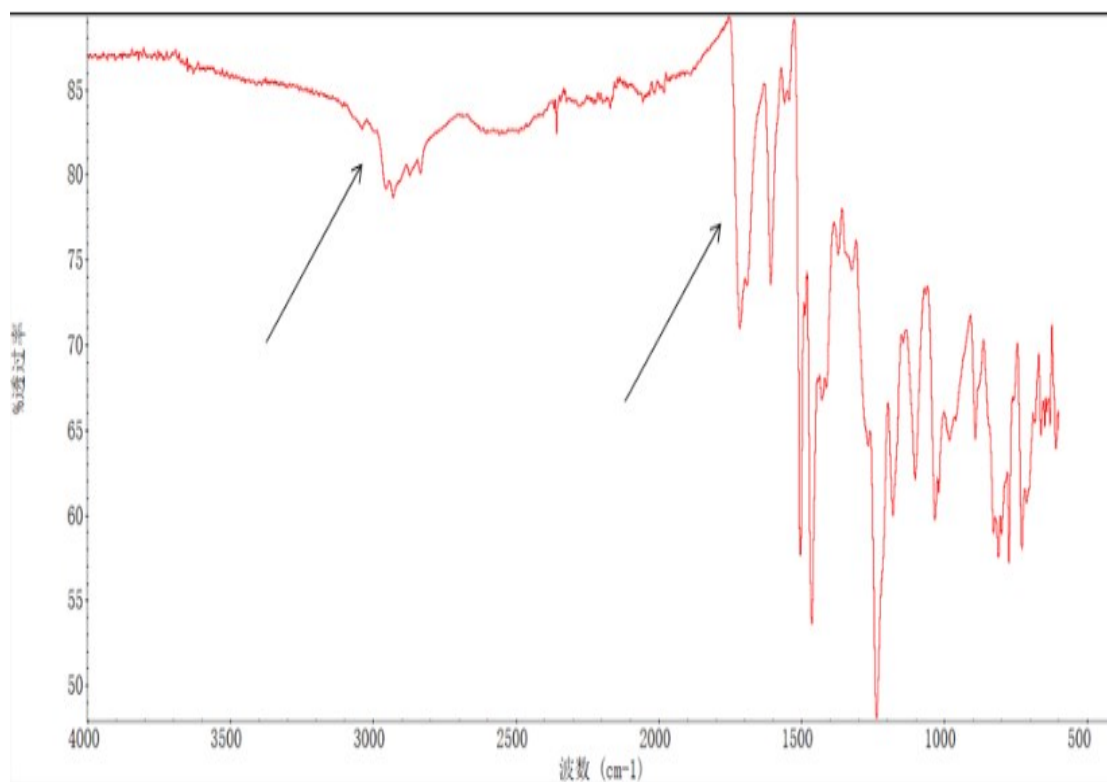

**Fig. S27.** Infrared spectrum of compound **BT6**
